# Supplementary material for: Covalent interactions between carbon nanotubes and P3HT by thiol–ene click chemistry towards improved thermoelectric performance
Source: Royal Society of Chemistry journal article supplement (doi:10.1039/d0qm00004c), 2020-01-01
Supplement: d0qm00004c1.pdf [file d0qm00004c1.pdf]

## Covalent interactions between carbon nanotube and P3HT by thiol-ene click chemistry towards improved thermoelectric performance

Chunyan Zhao,<sup>a</sup> Xinglong Wang,<sup>a</sup> Xin Chen,<sup>a</sup> Ying Liu,<sup>b</sup> Yannan Xie,<sup>\*b</sup> and Hui Xu,<sup>\*a</sup>

<sup>a</sup>Institute of Advanced Synthesis, School of Chemistry and Molecular Engineering, Jiangsu National Synergetic Innovation Center for Advanced Materials, Nanjing Tech University, Nanjing 211816, China.

<sup>b</sup>Key Laboratory for Organic Electronics and Information Displays (KLOEID) & Institute of Advanced Materials (IAM), Jiangsu Key Laboratory for Biosensors, Jiangsu National Synergetic Innovation Center for Advanced Materials (SICAM), Nanjing University of Posts & Telecommunications, Nanjing 210023, Jiangsu, China.

\*Correspondence to: E-mail: [iamynxie@njupt.edu.cn](mailto:iamynxie@njupt.edu.cn) and [ias\\_hxu@njtech.edu.cn](mailto:ias_hxu@njtech.edu.cn).

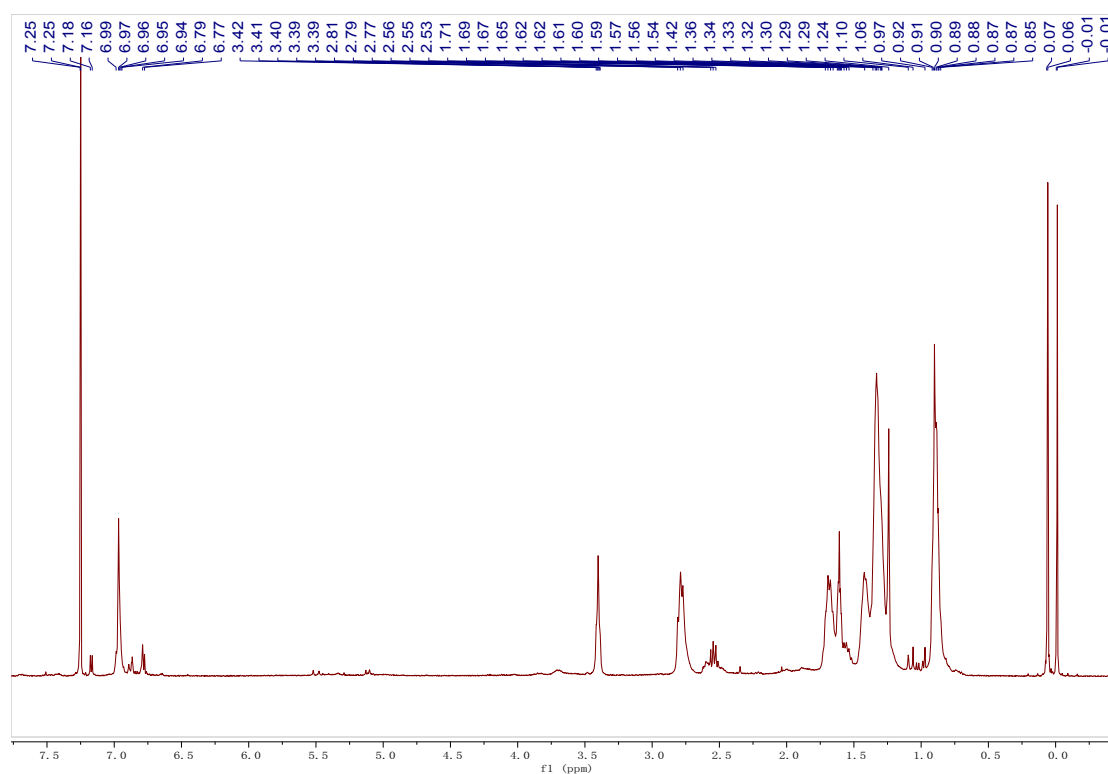

**Figure S1.** <sup>1</sup>H NMR spectrum of vinyl-terminated P3HT (i.e., P3HT-≡).
